# Supplementary material
Source: PubMed Central journal article supplement (PMC7662029)
Supplement: 41581_2020_363_MOESM1_ESM.pdf [file 41581_2020_363_MOESM1_ESM.pdf]

**Supplementary information**

---

**Sustainable Development Goals relevant to kidney health: an update on progress**

---

In the format provided by the authors and unedited

**Supplementary Table 1. Millennium Development Goals**

| MDG                                                 | Progress                                                                                                                                                                                                                                                                                                                                                                                                    | Gaps remaining in 2015                                                                                                                                                                              |
|-----------------------------------------------------|-------------------------------------------------------------------------------------------------------------------------------------------------------------------------------------------------------------------------------------------------------------------------------------------------------------------------------------------------------------------------------------------------------------|-----------------------------------------------------------------------------------------------------------------------------------------------------------------------------------------------------|
| <b>1. Eradicate poverty and hunger</b>              | <ul style="list-style-type: none"> <li>Reduction in proportion and number of people living in extreme poverty (&lt; 1\$.25/day): 47% (1990, 1.9 billion) -&gt; 14% (2015, 836 million)</li> <li>Working middle class (living on &gt; \$4/day) almost tripled from 1991 to 2015</li> <li>Proportion of undernourished in lower income regions declined: 23.3% (1990-1992) -&gt; 12.9% (2014-2016)</li> </ul> | <ul style="list-style-type: none"> <li>Children from poorest households more likely to be stunted, out of school, have higher U5MR</li> <li>Many people work under vulnerable conditions</li> </ul> |
| <b>2. Achieve universal primary education</b>       | <ul style="list-style-type: none"> <li>Primary school enrolment increased: 83% (2000) -&gt; 91% (2015)</li> <li>Primary school –aged children out of school decreased: 100 million (2000) -&gt; 57 million (2015)</li> <li>Literacy rate (youth aged 15-24y) increased: 83% (1990) -&gt; 91% (2015)</li> </ul>                                                                                              | <ul style="list-style-type: none"> <li>Children from poorest households more likely to be out of school</li> </ul>                                                                                  |
| <b>3. Promote gender equality and empower women</b> | <ul style="list-style-type: none"> <li>More girls are enrolled in school</li> <li>Women as proportion of workers outside the agricultural sector increased: 35% (1990) -&gt; 41% (2015), fewer are in vulnerable employment</li> <li>Proportion of women in parliament doubled, but remained 1:5</li> </ul>                                                                                                 | <ul style="list-style-type: none"> <li>Poverty rates higher in women</li> <li>Women earn less than men</li> <li>Higher unemployment in women</li> </ul>                                             |
| <b>4. Reduce child mortality</b>                    | <ul style="list-style-type: none"> <li>Global U5MR declined (deaths per 1000 live births): 90 (1990) -&gt; 43 (2015)</li> <li>Death in children under age 5 years declined: 12.7 million (1990) -&gt; 6 million (2015)</li> <li>Measles cases declined 67% between 2000 and 2013, due to more children receiving at least one dose of vaccination: 73% (2000) -&gt; 84% (2013)</li> </ul>                   | <ul style="list-style-type: none"> <li>Children from poorest households have higher U5MR</li> </ul>                                                                                                 |
| <b>5. Improve maternal health</b>                   | <ul style="list-style-type: none"> <li>MMR declined (deaths per 100 000 live births): 380 (1990) -&gt; 330 (2000) -&gt; 210 (2013)</li> <li>Global births with skilled birth attendants increased: 59% (1990) -&gt; 71% (2014)</li> <li>Contraception prevalence in women married /in a union increased: 55% (1990) -&gt; 64% (2015)</li> </ul>                                                             | <ul style="list-style-type: none"> <li>Rural women less likely to have births with SBA</li> <li>MMR higher in lower resources countries</li> </ul>                                                  |
| <b>6. Combat HIV/AIDS, Malaria</b>                  | <ul style="list-style-type: none"> <li>New HIV infections declined: 3.5 million (2000) -&gt; 2.1 million (2013)</li> </ul>                                                                                                                                                                                                                                                                                  | <ul style="list-style-type: none"> <li>Majority of people living with HIV do not</li> </ul>                                                                                                         |

|                                                        |                                                                                                                                                                                                                                                                                                                                                                                                                                                                                                                   |                                                                                                                                                                                                                                                                 |
|--------------------------------------------------------|-------------------------------------------------------------------------------------------------------------------------------------------------------------------------------------------------------------------------------------------------------------------------------------------------------------------------------------------------------------------------------------------------------------------------------------------------------------------------------------------------------------------|-----------------------------------------------------------------------------------------------------------------------------------------------------------------------------------------------------------------------------------------------------------------|
| <b>and other diseases</b>                              | <ul style="list-style-type: none"> <li>• Number of people living on ART increased: 800 000 (2003) -&gt; 13.6 million (2014)</li> <li>• 7.6 million HIV deaths averted (1995 to 2013)</li> <li>• Malaria incidence rate declined by 37%, mortality rate by 58%</li> <li>• 6.2million malaria deaths averted (2000 to 2015)</li> <li>• TB mortality rate declined 45%, prevalence rate by 41% (1990-2013)</li> <li>• 37 million lives saved through TB prevention, diagnosis and treatment (2000 – 2013)</li> </ul> | receive ART                                                                                                                                                                                                                                                     |
| <b>7. Ensure environmental stability</b>               | <ul style="list-style-type: none"> <li>• 98% of Ozone depleting substances eliminated since 1990</li> <li>• More protection of marine and terrestrial areas</li> <li>• Proportion with access to improved drinking water increased: 76% (1990) -&gt; 91% (2015)</li> <li>• 2.1 billion have better access to sanitation</li> <li>• Fewer people living in slums in lower income regions: 39.4% (2000) -&gt; 29.7% (2014)</li> </ul>                                                                               | <ul style="list-style-type: none"> <li>• CO2 emissions have increased</li> <li>• Rural populations have less access to improved drinking water and sanitation</li> <li>• Deforestation and overfishing continue</li> <li>• Increasing water scarcity</li> </ul> |
| <b>8. Develop a global partnership for development</b> | <ul style="list-style-type: none"> <li>• ODA from developed countries increased 66% from 2000 to 2014</li> <li>• Exemption from import taxes on products from lower resource countries increased: 65% of imports (2000) -&gt; 79% imports (2014)</li> <li>• Increased mobile cellular subscriptions: 738 million (2000) -? &gt; 7 billion (2015)</li> <li>• Internet penetration increased: 6% (2000) -&gt; 43% (2015)</li> </ul>                                                                                 | <ul style="list-style-type: none"> <li>• Displacement of millions of people due to conflicts continues</li> <li>• fewer children attend school in countries with conflict</li> <li>• higher poverty in countries with conflict</li> </ul>                       |

Data compiled from ref.<sup>1</sup>. U5MR – under 5 mortality rate; MMR – maternal mortality ration; HIV – human immunodeficiency virus; AIDS – acquired immunodeficiency disease; ART – anti-retroviral therapy; ITN – insecticide treated nets; TB – tuberculosis; ODA – official development assistance; CO2 – carbon dioxide

**Supplementary Table 2: Progress towards the Sustainable Development Goals**

| SDG                                                                                                                                                                                                                                                  | Progress                                                                                                                                                                                                                                          | Gaps                                                                                                                                                                                                                                                                                                                                                                                                                                                                                                                                                                                                                                                                                                                                                                                                                                                                                                                                                                                                                                         |
|------------------------------------------------------------------------------------------------------------------------------------------------------------------------------------------------------------------------------------------------------|---------------------------------------------------------------------------------------------------------------------------------------------------------------------------------------------------------------------------------------------------|----------------------------------------------------------------------------------------------------------------------------------------------------------------------------------------------------------------------------------------------------------------------------------------------------------------------------------------------------------------------------------------------------------------------------------------------------------------------------------------------------------------------------------------------------------------------------------------------------------------------------------------------------------------------------------------------------------------------------------------------------------------------------------------------------------------------------------------------------------------------------------------------------------------------------------------------------------------------------------------------------------------------------------------------|
| <p><b>1. No Poverty:</b> End poverty in all its forms everywhere</p> <p>(Extreme poverty defined as living on &lt; US\$1.90 a day)</p> <ul style="list-style-type: none"> <li>• <b>Target:</b> &lt; 3% of world living in extreme poverty</li> </ul> | <ul style="list-style-type: none"> <li>• <b>Living &lt; US\$1.90 a day:</b> 36% (1990) -&gt; 16% (2010) -&gt; 10% (2015) -&gt; 8.6% (2018)</li> <li>• <b>Proportion of employed living &lt; \$1.90/day:</b> 14% (2010) -&gt; 8% (2018)</li> </ul> | <ul style="list-style-type: none"> <li>• &gt; 700 million live in extreme poverty, majority in SSA</li> <li>• 50% of global population live in &lt; \$2 per day</li> <li>• 8 % of employed worldwide lived in extreme poverty in 2018 (38% in SSA)</li> <li>• 22% of unemployed receive unemployment cash benefits</li> <li>• 28% of those with disabilities receive disability cash benefits</li> <li>• 122 women: 100 men aged 25 to 34 live in extreme poverty</li> <li>• rural poverty rate is 3 fold higher than in urban areas</li> <li>• High poverty rates in fragile and conflict-affected countries.</li> <li>• 1 out of 5 children live in extreme poverty.</li> <li>• 41% of women giving birth received maternity cash benefits (2018)</li> <li>• 55% of the world's population (4 billion people in 2016) have no access to social protection (87% in SSA, 14% in Europe and N. America)</li> <li>• <b>Direct economic losses from disasters</b> increased 151% from the period 1978-1997 to the period 1998 - 2017</li> </ul> |
| <p><b>2. Zero Hunger:</b> end hunger, achieve food security and improved nutrition and promote sustainable agriculture</p>                                                                                                                           | <ul style="list-style-type: none"> <li>• <b>Child stunting:</b> 32.4% (2000) -&gt; 21.3% (2019)</li> </ul>                                                                                                                                        | <ul style="list-style-type: none"> <li>• World hunger is increasing again: 821 million people (1 in 9) were undernourished in 2017 (increase from 784 million in 2015)</li> <li>• 1 in 5 people in Africa are undernourished</li> <li>• Undernourishment contributes to 45 % of global child deaths &lt;5 years</li> <li>• 22 % of children &lt; 5 years are chronically undernourished (2018)</li> <li>• 144 million children &lt; 5 years stunted (2019)</li> <li>• 47 million children (6.9%) &lt; 5 years wasted (2019)</li> <li>• 40 million children (5.9%) &lt; 5 years overweight (2018)</li> <li>• 2 billion people are obese or overweight</li> <li>• Small-scale food producers comprise 40-85% of food production in Africa, Asia and Latin America</li> <li>• Donor sector-allocable aid for agriculture in declined from 25% to 5% from the mid-19080s to 2017 in low resource settings</li> <li>• Proportional government spending on agriculture declined 37% between 2001 and 2017</li> </ul>                               |
| <p><b>3. Good health and well-being:</b> Ensure healthy lives and promote well-being for all at all ages</p>                                                                                                                                         | <ul style="list-style-type: none"> <li>• <b>Global birth with skilled birth attendant:</b> 69% (2012) -&gt; 81% (2019)</li> </ul>                                                                                                                 | <ul style="list-style-type: none"> <li>• &gt; 5 million children die before age 5 annually</li> <li>• 19.9 million children not vaccinated in 1st year of life</li> </ul>                                                                                                                                                                                                                                                                                                                                                                                                                                                                                                                                                                                                                                                                                                                                                                                                                                                                    |

| SDG                                                                                                                                                                                                                   | Progress                                                                                                                                                                                                                                                                                                                                                                                                                                                                                                                                                                                                                                                                                                                                                                                                                                                                                                                                                                                                                                                                                                                                                                                                                                                                                                                                                                                                                                                                                                                                                                                                                                                                                                                                                                                                                                                                            | Gaps                                                                                                                                                                                                                                                                                                                                                                                                                                                                                                                                                                                                                                                                                                                                                                                                                                                                                                                                                                                                                                                                                                                                                                                                                                                                                                                                                                                                                                                                                                                                                                                                                                                     |
|-----------------------------------------------------------------------------------------------------------------------------------------------------------------------------------------------------------------------|-------------------------------------------------------------------------------------------------------------------------------------------------------------------------------------------------------------------------------------------------------------------------------------------------------------------------------------------------------------------------------------------------------------------------------------------------------------------------------------------------------------------------------------------------------------------------------------------------------------------------------------------------------------------------------------------------------------------------------------------------------------------------------------------------------------------------------------------------------------------------------------------------------------------------------------------------------------------------------------------------------------------------------------------------------------------------------------------------------------------------------------------------------------------------------------------------------------------------------------------------------------------------------------------------------------------------------------------------------------------------------------------------------------------------------------------------------------------------------------------------------------------------------------------------------------------------------------------------------------------------------------------------------------------------------------------------------------------------------------------------------------------------------------------------------------------------------------------------------------------------------------|----------------------------------------------------------------------------------------------------------------------------------------------------------------------------------------------------------------------------------------------------------------------------------------------------------------------------------------------------------------------------------------------------------------------------------------------------------------------------------------------------------------------------------------------------------------------------------------------------------------------------------------------------------------------------------------------------------------------------------------------------------------------------------------------------------------------------------------------------------------------------------------------------------------------------------------------------------------------------------------------------------------------------------------------------------------------------------------------------------------------------------------------------------------------------------------------------------------------------------------------------------------------------------------------------------------------------------------------------------------------------------------------------------------------------------------------------------------------------------------------------------------------------------------------------------------------------------------------------------------------------------------------------------|
| <ul style="list-style-type: none"> <li>● <b>Targets by 2030:</b> <ul style="list-style-type: none"> <li>○ &lt; 70 maternal deaths per 100, 000 live births</li> <li>○ Reduce NCD deaths by 1/3</li> </ul> </li> </ul> | <ul style="list-style-type: none"> <li>● <b>Maternal mortality</b> has decreased by 38% since 2000</li> <li>● <b>Under 5 mortality rate</b> (deaths per 1000 live births): 76 (2000) -&gt; 42 (2015) -&gt; 39 (2018)</li> <li>● <b>Neonatal mortality rate</b> (deaths per 1000 live births): 31 (2000) -&gt; 18 (2017)</li> <li>● <b>DPT coverage:</b> 72% (2000) -&gt; 86% (2018), no change from 2015</li> <li>● <b>Measles 2<sup>nd</sup> vaccine coverage:</b> 15% (2000) -&gt; 59% (2015) -&gt; 69% (2018)</li> <li>● <b>Pneumococcal vaccine coverage:</b> 4% (2008) -&gt; 44% (2017)</li> <li>● <b>Hepatitis B vaccine coverage</b> (3<sup>rd</sup> dose): 30% (2000) -&gt; 84% (2018)</li> <li>● <b>Access to family planning</b> (women 15-49 years): 74% (2000) -&gt; 767% (2020)</li> <li>● <b>Adolescent fertility rate</b> (births per 1000 adolescent women): 56 (2000) -&gt; 45 (2015) -&gt; 41 (2020)</li> <li>● <b>HIV incidence rate</b> (new cases per 1000 uninfected adults aged 15-49 years): 0.47 (2000) -&gt; 0.52 (2010) -&gt; 0.44 (2015) -&gt; 0.4 (2017) -&gt; 0.24 (2018)</li> <li>● <b>Tuberculosis</b> (new and relapses per 100,000 people): 172 (2000) -&gt; 140 (2015) -&gt; 132 (2018)</li> <li>● <b>Malaria</b> (cases per 1000 population): 81 (2000) -&gt; 57 (2018) cases unchanged since 2014</li> <li>● <b>Hepatitis B prevalence in children &lt; 5 years:</b> 4.7% (pre-vaccine) -&gt; 0.8% (2017)</li> <li>● <b>Need for mass drug administration/treatment for NTDs:</b> 2.03 billion (2010) -&gt; 1.63 billion (2015) -&gt; 1.58 billion (2017)</li> <li>● <b>Global suicide rate</b> (per 100,000): 12.9 (2000) -&gt; 10.6 (2016)</li> <li>● <b>Tobacco use</b> (prevalence): 33% (2000) -&gt; 23.6% (2018)</li> <li>● <b>ODA for basic health</b> from all donors increased 61% from 2010 to 2017</li> <li>● <b>UHC</b></li> </ul> | <ul style="list-style-type: none"> <li>● Drug-resistant TB remains a major threat</li> <li>● Malaria deaths have not declined between 2015 and 2017</li> <li>● 3.5 million more malaria deaths in 10 highest burden countries in 2017 compared to 2016</li> <li>● Maternal mortality ratio varies 14 fold across the globe</li> <li>● Probability of dying of CVD, Cancer, chronic lung disease or diabetes (ages 30-70 years): 16% (2016)</li> <li>● 8.1 million deaths related to tobacco (2017)</li> <li>● Majority of ODA spent on HIV, Tuberculosis, Malaria and other infections</li> <li>● 39% of countries have &lt; 10 physicians per 10,000 population</li> <li>● 58% of countries have &lt; 40 nurses or midwives per 10,1000 population</li> <li>● 22.4% of 25 countries sampled) provided access to essential medicines in PHC settings [28% had no accessible medicines]</li> <li>● 33-49% covered by essential health services (2017)</li> <li>● CHE (10%): 9.4% (2000) -&gt; 12.7% (2015) -&gt; 12.9% (2020, 1 billion people)</li> <li>● CHE (25%): 1.7% (2000) -&gt; 3% (2015)</li> <li>● 87% of those with large OPE from MICs (2015)</li> <li>● Relative poverty due to OOP spending for health, additional people pushed into poverty: 110.9 million (1.8%, 2000) -&gt; 183.2 million (2.5%, 2015)</li> <li>● Within countries, persistent inequalities between richer vs. poorer quintiles, urban vs. rural</li> <li>● <u>NCDs:</u> <ul style="list-style-type: none"> <li>○ Premature diabetes mortality increased 5% from 2000 to 2016</li> <li>○ Prevalence hypertension, 2015: 28.4% (LIC), 17.5% (HIC)</li> </ul> </li> </ul> |

| SDG                                                                                                                                      | Progress                                                                                                                                                                                                                                                                                                                                                                                                                                                                 | Gaps                                                                                                                                                                                                                                                                                                                                                                                                                                                                                                                                                                                                                                                                                                                                                                                                                                                                |
|------------------------------------------------------------------------------------------------------------------------------------------|--------------------------------------------------------------------------------------------------------------------------------------------------------------------------------------------------------------------------------------------------------------------------------------------------------------------------------------------------------------------------------------------------------------------------------------------------------------------------|---------------------------------------------------------------------------------------------------------------------------------------------------------------------------------------------------------------------------------------------------------------------------------------------------------------------------------------------------------------------------------------------------------------------------------------------------------------------------------------------------------------------------------------------------------------------------------------------------------------------------------------------------------------------------------------------------------------------------------------------------------------------------------------------------------------------------------------------------------------------|
|                                                                                                                                          | <ul style="list-style-type: none"> <li>○ Service coverage index: 45 (2000) -&gt; 66 (2017)</li> <li>● People pushed into extreme poverty by health spending: 123.9 million (2%, 2000) -&gt; 89.7 million (1.2%, 2015)</li> <li>● Probability of premature mortality from one of 4 major NCDs: 18% decrease from 2000 to 2016 (40% chronic respiratory, 19% cancer, 19% cardiovascular)</li> <li>● Prevalence of hypertension decreased 155% from 2000 to 2015</li> </ul> |                                                                                                                                                                                                                                                                                                                                                                                                                                                                                                                                                                                                                                                                                                                                                                                                                                                                     |
| <p><b>4. Quality education:</b> Ensure inclusive and equitable quality education and promote lifelong learning opportunities for all</p> | <ul style="list-style-type: none"> <li>● <b>Enrollment in primary education</b> has reached 91% in lower resource countries</li> </ul>                                                                                                                                                                                                                                                                                                                                   | <ul style="list-style-type: none"> <li>● 262 million children out of school (2017), 22% of primary school age</li> <li>● &gt;50% of children and adolescents did not meet minimum proficiency levels (2015)</li> <li>● 85% of primary school teachers are trained</li> <li>● 750 million adults illiterate (2016) – 2/3 are women</li> <li>● 1/3 of all countries spend 15-20% of government expenditure on education</li> <li>● Children of mothers who complete at least primary schooling are more likely to survive</li> <li>● Globally: <ul style="list-style-type: none"> <li>● 90% of schools have electricity (57% in SSA)</li> <li>● 84% have basic drinking water (50% in SSA)</li> <li>● 76% have computer access (44% in SSA)</li> <li>● 72% have hand washing facilities (40% in SSA)</li> <li>● 64% have internet (25% in SSA)</li> </ul> </li> </ul> |
| <p><b>5. Gender equality:</b> Achieve gender equality and empower all women and girls</p>                                                | <ul style="list-style-type: none"> <li>● <b>FGM</b> declined from 1 in 2 (2000) to 1 in 3 (2017)</li> <li>● Risk of <b>child marriage</b> decreased by 40% since 2000 in Southern Asia</li> <li>● Female parliamentarians: 19% (2010) -&gt; 24% (2019)</li> <li>● Over 100 countries track budget allocation for gender equality to some degree</li> </ul>                                                                                                               | <ul style="list-style-type: none"> <li>● Women are 13% of global landholders</li> <li>● If women farmers received same resources as men -&gt; world hunger could decrease by up to 150 million</li> <li>● Gender-based inequalities and violence put adolescent girls and young women at risk of HIV.</li> <li>● In central Asia 27% more girls do not attend school compared with boys</li> <li>● 18 % of women (aged 14-49) experience domestic violence</li> <li>● 49 countries have no legislation protecting women from domestic violence</li> <li>● 18 countries – men can legally prevent wives from working</li> <li>● 39 countries – daughters inherit less than sons</li> <li>● 27% of managerial positions globally were occupied by women (2018) who</li> </ul>                                                                                         |

| SDG                                                                                                                                                                    | Progress                                                                                                                                                                                                                                                                                                                                                                                                                                                                                                                                                                       | Gaps                                                                                                                                                                                                                                                                                                                                                                                                                                                                                                                                                                                                                |
|------------------------------------------------------------------------------------------------------------------------------------------------------------------------|--------------------------------------------------------------------------------------------------------------------------------------------------------------------------------------------------------------------------------------------------------------------------------------------------------------------------------------------------------------------------------------------------------------------------------------------------------------------------------------------------------------------------------------------------------------------------------|---------------------------------------------------------------------------------------------------------------------------------------------------------------------------------------------------------------------------------------------------------------------------------------------------------------------------------------------------------------------------------------------------------------------------------------------------------------------------------------------------------------------------------------------------------------------------------------------------------------------|
|                                                                                                                                                                        |                                                                                                                                                                                                                                                                                                                                                                                                                                                                                                                                                                                | <p>comprise 39% of the workforce</p> <ul style="list-style-type: none"> <li>• Global gender pay gap: 23%</li> <li>• 740 million women and girls married before age 18</li> <li>• 57% of women 15-49 years are in control of their own sexual relations and use of family planning</li> <li>• Women and girls collect water in 80% of households</li> <li>• Women make up 76% of medical doctors and nurses (40% doctors, 90% nurses)</li> </ul>                                                                                                                                                                     |
| <p><b>6. Clean water and sanitation:</b><br/>Ensure availability and sustainability of water and sanitation for all</p>                                                | <ul style="list-style-type: none"> <li>• <b>Access to improved drinking water:</b> 76% (1990) -&gt; 90% (2015)</li> <li>• <b>Access to safe drinking water:</b> 61% (2000) -&gt; 71% (2015)</li> <li>• <b>Use of safe sanitation:</b> 28% (2000) -&gt; 43% (2015) -&gt; 45% (2017)</li> <li>• 80% of countries have at least medium-low or higher levels of <b>integrated water management</b></li> <li>• <b>ODA commitments to water sector</b> increased 36% between 2016 and 2017</li> </ul>                                                                                | <ul style="list-style-type: none"> <li>• &lt; 3% of worlds water is drinkable (fresh), 2.5% is frozen in Antarctica</li> <li>• 786 million people did not have access to basic drinking water (2017)</li> <li>• 1 in 4 health facilities do not have access to basic water services</li> <li>• 3 in 10 people do not have access to safe drinking water</li> <li>• 6 in 10 people do not have access to safe sanitation</li> <li>• 701 million practice open defecation (2017)</li> <li>• 40% affected by water scarcity</li> <li>• Rapid urbanization puts pressure on water supply and sewage disposal</li> </ul> |
| <p><b>7. Affordable and clean energy:</b><br/>Ensure access to affordable, reliable, sustainable and modern energy for all</p>                                         | <ul style="list-style-type: none"> <li>• <b>Global rate of electrification:</b> 78% (2000) -&gt; 83% (2010) -&gt; 87% (2015) -&gt; 89% (2017)</li> <li>• <b>Access to clean cooking fuels:</b> 57% (2010) -&gt; 61% (2017)</li> <li>• <b>Renewable energy as proportion of total fine energy consumption:</b> 16,6% (2010) -&gt; 17.5% (2016)</li> <li>• <b>International financing to lower resource countries for renewable energy:</b> \$9.9 billion (2010) -&gt; \$18.6 (2016)</li> <li>• <b>2.3% less energy required to generate \$1</b> annually (2010-2016)</li> </ul> | <ul style="list-style-type: none"> <li>• 840 million people have no access to electricity (87% in rural areas)</li> <li>• Energy poverty impacts world hunger by impacting food production</li> <li>• 2.8 billion rely on inefficient and polluting cooking systems</li> <li>• 60% of global green house gas emissions generated through energy</li> </ul>                                                                                                                                                                                                                                                          |
| <p><b>8. Decent work and economic growth:</b> Promote sustained, inclusive and sustainable economic growth, full and productive employment and decent work for all</p> | <ul style="list-style-type: none"> <li>• <b>Global growth real GDP per capita:</b> 3% (2010) -&gt; 1.63% (2015) -&gt; 1.9% (2017)</li> <li>• <b>Real GDP in LDCs:</b> 4.8% increase in LDCs (2010 - 2017) -&gt; 5.7% (2020)</li> <li>• <b>Labour productivity</b> (real GDP per worker): 1.6% (2015) -&gt; 2.1% (2018)</li> </ul>                                                                                                                                                                                                                                              | <ul style="list-style-type: none"> <li>• 21% global youth (30% women, 13% men) not <b>engaged in work, education or training</b> (2018)</li> <li>• 8% of workers live in extreme poverty</li> <li>• 61% work in informal sector (2016)</li> <li>• median <b>hourly wage</b> 12 -20% higher for men</li> <li>• <b>3 worker deaths</b> per 100, 000 employees</li> </ul>                                                                                                                                                                                                                                              |

| SDG                                                                                                                                                                 | Progress                                                                                                                                                                                                                                                                                                                                                                                                                                                                                                                                                                                                                                                                                                                                        | Gaps                                                                                                                                                                                                                                                                                                                                                                                                                                                                                                                                                                                                                                                                                                                                                                                                                                                                                                                                                                                                                                                                                                           |
|---------------------------------------------------------------------------------------------------------------------------------------------------------------------|-------------------------------------------------------------------------------------------------------------------------------------------------------------------------------------------------------------------------------------------------------------------------------------------------------------------------------------------------------------------------------------------------------------------------------------------------------------------------------------------------------------------------------------------------------------------------------------------------------------------------------------------------------------------------------------------------------------------------------------------------|----------------------------------------------------------------------------------------------------------------------------------------------------------------------------------------------------------------------------------------------------------------------------------------------------------------------------------------------------------------------------------------------------------------------------------------------------------------------------------------------------------------------------------------------------------------------------------------------------------------------------------------------------------------------------------------------------------------------------------------------------------------------------------------------------------------------------------------------------------------------------------------------------------------------------------------------------------------------------------------------------------------------------------------------------------------------------------------------------------------|
| <ul style="list-style-type: none"> <li>• <b>Target:</b> 7% growth rate by 2030</li> <li>• <b>On Target:</b> no</li> </ul>                                           | <ul style="list-style-type: none"> <li>• <b>Global unemployment:</b> 6.4% (2000) -&gt; 5.7% (2017)</li> <li>• <b>Number of ATMs</b> (per 100, 000 adults): 45 (2010) -&gt; 66 (2017)</li> <li>• <b>“Aid for trade”:</b> \$23.1 billion (2002-2005) -&gt; \$58 billion (2017)</li> </ul>                                                                                                                                                                                                                                                                                                                                                                                                                                                         | <ul style="list-style-type: none"> <li>• 889 <b>non-fatal injuries</b> per 100, 000 employees</li> </ul>                                                                                                                                                                                                                                                                                                                                                                                                                                                                                                                                                                                                                                                                                                                                                                                                                                                                                                                                                                                                       |
| <p><b>9. Industry, innovation and infrastructure:</b> Build resilient infrastructure, promote inclusive and sustainable industrialization and foster innovation</p> | <ul style="list-style-type: none"> <li>• <b>Global manufacturing value added (MVA) share in GDP:</b> 15.2% (2005) -&gt; 15.9% (2008)-&gt; 16.5% (2015) -&gt; 16.3% (2017)</li> <li>• Each manufacturing job generates 2.2. others</li> <li>• <b>Global CO2 emission intensity:</b> decreased 20% from 2000 to 2016</li> <li>• <b>Global investment in research and development (R&amp;D):</b> \$739 billion (2000) -&gt; \$2 trillion (2016)</li> <li>• <b>Global GDP invested in R&amp;D:</b> 1.52% (2000) -&gt; 1.68% (2016)</li> <li>• <b>Researchers per million inhabitants:</b> 804 (2000) -&gt; 1163 (2016)</li> <li>• <b>Flows for economic infrastructure</b> (lower-resource countries): increase by 32.5 % (2010 to 2017)</li> </ul> | <ul style="list-style-type: none"> <li>• <b>MVA per capita (industrialization):</b> \$114 in LDC, \$4,938 Europe and N. America100</li> <li>• <b>Manufacturing share of employment:</b> Global <b>unemployment</b> 5.7%</li> <li>• 15.3% (2000) -&gt; 14.7% (2015) -&gt; 14.2% (2018)</li> <li>• <b>3.8 billion</b> people have no access to the internet (80% of population in LDCs)</li> <li>• 90% of people live within range of mobile cellular networks</li> <li>• 16% have no access to mobile broadband networks</li> <li>• infrastructure limitations reduce productivity by 40% in lower income countries in Africa</li> <li>• Industrial processing of agricultural products: 30% in lower income countries vs. 98% in high-income countries</li> </ul>                                                                                                                                                                                                                                                                                                                                              |
| <p><b>10. Reduced inequalities:</b> Reduce inequality within and among countries</p>                                                                                | <ul style="list-style-type: none"> <li>• <b>Annualized per capita growth rate in bottom 40% of population</b> increased faster than national average in &gt;50% of 92 countries</li> <li>• <b>Preferential trade status:</b> 66% of exports from LDCs (2017), 20% higher than in 2010</li> </ul>                                                                                                                                                                                                                                                                                                                                                                                                                                                | <p><i>Within-country inequities (examples)</i></p> <ul style="list-style-type: none"> <li>• Bottom 40% of population receive &lt; 25% of overall income</li> <li>• Top 1% gaining increasing share of income</li> <li>• Mortality in children &lt; 5 years born into poverty twice as high as that in children from wealthier families</li> <li>• World’s largest minority: persons with disabilities -&gt; incur 4-5 fold CHE</li> <li>• Maternal mortality 3 x higher in rural areas</li> </ul> <p><i>Global inequities (examples):</i></p> <ul style="list-style-type: none"> <li>• 54% of countries have <b>policies on migrant rights</b></li> <li>• Proportion of <b>employed living in extreme poverty</b> (2018): 38% (SAA) vs. 1.7% (Eastern and South-Eastern Asia)</li> <li>• Proportion of <b>children stunted</b> (2018): 38% (Oceania) vs. 2.6% (Europe and N. America)</li> <li>• Proportion of <b>children overweight</b> (2018): 9.8% (N. Africa and W. Asia) vs. 3.4% (Central and S. Asia)</li> <li>• Percent children without <b>minimum proficiency in reading</b> (2015): 88%</li> </ul> |



| SDG                                                                                                                                                                                                                | Progress                                                                                                                                                                                                                                                                                                        | Gaps                                                                                                                                                                                                                                                                                                                                                                                                                                                                                                                                                                                                                                                                                                                                                                                                                                                                                                                                                                                                                                                                     |
|--------------------------------------------------------------------------------------------------------------------------------------------------------------------------------------------------------------------|-----------------------------------------------------------------------------------------------------------------------------------------------------------------------------------------------------------------------------------------------------------------------------------------------------------------|--------------------------------------------------------------------------------------------------------------------------------------------------------------------------------------------------------------------------------------------------------------------------------------------------------------------------------------------------------------------------------------------------------------------------------------------------------------------------------------------------------------------------------------------------------------------------------------------------------------------------------------------------------------------------------------------------------------------------------------------------------------------------------------------------------------------------------------------------------------------------------------------------------------------------------------------------------------------------------------------------------------------------------------------------------------------------|
|                                                                                                                                                                                                                    |                                                                                                                                                                                                                                                                                                                 | <p>(SSA) vs. 14% (Europe and N. America)</p> <ul style="list-style-type: none"> <li>• Women 15-49 years experiencing <b>domestic violence</b> (2005-2017): 23% Central and S. Asia vs. 6% (Europe)</li> <li>• Average <b>integrated water resources management</b> score: 35 (Latin America) vs. 72 (Australia, New Zealand)</li> <li>• Population with <b>access to electricity</b> (2017): 44% (SSA) vs. 100% (Europe, N. America, Australia, New Zealand)</li> <li>• Convenient <b>access to public transport</b>: 18% (SSA) vs. 75% (Australian, New Zealand)</li> <li>• <b>Material footprint</b> (metric tons per person) in HIC is 13 x that of LIC</li> <li>• “developing countries” represent 75% of Wold Bank countries but have 40% of voting rights in IMF (2018)</li> <li>• Proportion of <b>degraded land</b>: 35.5% (Oceania) vs. 7% (N. Africa)</li> <li>• <b>Birth registration</b>: 46% (SSA) vs. 100% (Europe and N. America)</li> <li>• <b>Internet access</b>: &gt;80% in developed countries; 45% in developing countries; 20% in LDCs.</li> </ul> |
| <p><b>11. Sustainable cities and communities:</b> Make cities and human settlements inclusive, safe, resilient and sustainable</p>                                                                                 | <ul style="list-style-type: none"> <li>• <b>Urban residence</b>: 3.5 billion (2019) -&gt; 5 billion, 60% (2030)</li> <li>• <b>Proportion of urban population living in slums</b>: 46% (1990) -&gt; 23% (2016)</li> <li>• 150 countries have national urban plans, half are implementing these (2019)</li> </ul> | <ul style="list-style-type: none"> <li>• &gt;1 billion people (1 in 4 urban dwellers) live in <b>slums</b></li> <li>• 2 billion people do not have <b>waste collection</b>, 3 billion have no <b>waste disposal</b> facilities</li> <li>• Total <b>waste generated</b> is increasing: 2 billion tons (2016) -&gt; 4 billion tons (2050)</li> <li>• 53% of urban dwellers can access <b>public transport</b> within 0.5 – 1 Km walking distance</li> <li>• Cities generate 70% of <b>carbon emissions</b></li> <li>• Cities consume 60-80% of <b>global energy</b></li> <li>• 9 of 10 urban dwellers are exposed to <b>polluted air</b></li> <li>• Air pollution -&gt; 7 million deaths (2016)</li> <li>• 6 of 10 deaths from indoor pollution (4.3 Million total) are women and girls</li> <li>• 21% of population had access to public spaces within 400m walking(2018)</li> </ul>                                                                                                                                                                                      |
| <p><b>12. Responsible consumption and production:</b> Ensure sustainable consumption and production patterns</p> <ul style="list-style-type: none"> <li>• <b>Aim:</b> “doing more and better with less”</li> </ul> | <ul style="list-style-type: none"> <li>• Nearly <b>100 countries</b> are adopting and implementing <b>policies</b> to increase sustainable consumption</li> <li>• 93% of 250 of the worlds largest <b>companies report sustainability</b></li> </ul>                                                            | <ul style="list-style-type: none"> <li>• 3 billion rely on <b>inefficient cooking systems</b> (wood, charcoal, dung, coal) -&gt; contribute to pollution</li> <li>• 1/3 of <b>food</b> produced each year is <b>wasted</b></li> <li>• 29% of <b>global energy</b> is consumed by households</li> <li>• Households generate 21% of <b>CO2 emissions</b></li> </ul>                                                                                                                                                                                                                                                                                                                                                                                                                                                                                                                                                                                                                                                                                                        |

| SDG                                                                                                                                                                                                        | Progress                                                                                                                                                                                                                                                                                                                                                                                                                                                                                            | Gaps                                                                                                                                                                                                                                                                                                                                                                                                                                                                                                                                                                                                                                                                                                                               |
|------------------------------------------------------------------------------------------------------------------------------------------------------------------------------------------------------------|-----------------------------------------------------------------------------------------------------------------------------------------------------------------------------------------------------------------------------------------------------------------------------------------------------------------------------------------------------------------------------------------------------------------------------------------------------------------------------------------------------|------------------------------------------------------------------------------------------------------------------------------------------------------------------------------------------------------------------------------------------------------------------------------------------------------------------------------------------------------------------------------------------------------------------------------------------------------------------------------------------------------------------------------------------------------------------------------------------------------------------------------------------------------------------------------------------------------------------------------------|
|                                                                                                                                                                                                            |                                                                                                                                                                                                                                                                                                                                                                                                                                                                                                     | <ul style="list-style-type: none"> <li>• <b>Material consumption</b> (billion tons): 27 (1970) -&gt; 87 (2015) -&gt; 92.1 (2017) -&gt; puts pressure on natural resources</li> <li>• <b>Material footprint per capita</b> (metric tons per person): 8.8 (2000) -&gt; 12.2 (2017)</li> <li>• <b>32% increase in personal vehicle ownership</b> (2002 to 2020) with a 40% increase in vehicle kilometres</li> <li>• Global air travel projected to triple (2002 to 2020)</li> <li>• Renewable energy comprised 17.5% of global total energy (2015)</li> <li>• Food sector consumes 30% of global energy</li> <li>• Food sector contributes 22% of CO2 emissions</li> </ul>                                                           |
| <p><b>13. Climate action:</b> Take urgent action to combat climate change and its impacts</p>                                                                                                              | <ul style="list-style-type: none"> <li>• <b>Paris agreement</b> has been ratified by 185 parties (2019)</li> <li>• <b>Global climate finance flows</b> increased 17% from 2013-2014 to 2015-2016 (renewable energy, sustainable transport, energy efficiency, etc.)</li> <li>• <b>Green Climate Fund</b> is available to finance national adaptation plans (NAPs)</li> </ul>                                                                                                                        | <ul style="list-style-type: none"> <li>• <b>Greenhouse gas concentrations</b> (mole fractions of CO2, parts per million): 400.1 (2015) -&gt; 405.5 (2017)</li> <li>• Climate change is increasing risks of natural disasters, including droughts and floods</li> <li>• Investment in fossil fuels remains higher than in climate activities</li> <li>• Grain yields decrease by 5% for each degree increase in temperature</li> <li>• Carbon emission must fall by 45% from 2010 to 2030 to limit global warming to 1.5°C</li> </ul>                                                                                                                                                                                               |
| <p><b>14. Life below water:</b> Conserve and sustainably use the oceans, seas and marine resources for sustainable development</p>                                                                         | <ul style="list-style-type: none"> <li>• 87 countries signed <b>Agreement on Port State Measures</b> to reduce illegal and unregulated fishing (2019)</li> <li>• <b>Coastal water quality</b> improved in 104 of 220 coastal regions between 2012 and 2018</li> <li>• <b>Waters under national jurisdiction:</b> 12% (2015) -&gt; 17.2% (2018)</li> <li>• <b>Global proportion of marine biodiversity covered by protected areas:</b> 31.2% (2000) -&gt; 44.7% (2015) -&gt; 45.7% (2018)</li> </ul> | <ul style="list-style-type: none"> <li>• Oceans contain 97% of Earth's water</li> <li>• Oceans buffer global warming by absorbing 30% of CO2 produced by humans -&gt; leads to acidification of the oceans</li> <li>• &gt;3 Billion people rely on the ocean for source of protein intake</li> <li>• 200 million people are employed through marine fisheries</li> <li>• Proportion of <b>biologically sustainable fish stocks:</b> 90% (1974) -&gt; 67% (2015)</li> <li>• &gt;80% of world merchandise is transported by sea</li> <li>• &gt; 80% waste water discharged into rivers and seas without processing</li> <li>• Global average sea level rose 19cm from 1901 to 2010 because of global warming and ice melt</li> </ul> |
| <p><b>15. Life on land:</b> Protect, restore and promote sustainable use of terrestrial ecosystems, sustainably manage forests, combat desertification, and halt and reverse land degradation and halt</p> | <ul style="list-style-type: none"> <li>• <b>Land currently under protection:</b> 15%</li> <li>• <b>Lion's Share fund</b> supports animals and their habitats globally</li> <li>• <b>Increase in global mean percent of biodiversity area protected:</b></li> </ul>                                                                                                                                                                                                                                  | <ul style="list-style-type: none"> <li>• Crop diversity has decreased by 75% since 1900 -&gt; contributes to undernourishment</li> <li>• Urban areas are expanding fast but densities are declining -&gt; environmental repercussions</li> <li>• Forrest cover 30.7% of Earth's surface</li> </ul>                                                                                                                                                                                                                                                                                                                                                                                                                                 |

| SDG                                                                                                                                                                                                                                                                                                                          | Progress                                                                                                                                                                                                                                                                                                                                                                                                                                                                                                                        | Gaps                                                                                                                                                                                                                                                                                                                                                                                                                                                                                                                                                                                                                                                                                                     |
|------------------------------------------------------------------------------------------------------------------------------------------------------------------------------------------------------------------------------------------------------------------------------------------------------------------------------|---------------------------------------------------------------------------------------------------------------------------------------------------------------------------------------------------------------------------------------------------------------------------------------------------------------------------------------------------------------------------------------------------------------------------------------------------------------------------------------------------------------------------------|----------------------------------------------------------------------------------------------------------------------------------------------------------------------------------------------------------------------------------------------------------------------------------------------------------------------------------------------------------------------------------------------------------------------------------------------------------------------------------------------------------------------------------------------------------------------------------------------------------------------------------------------------------------------------------------------------------|
| biodiversity loss                                                                                                                                                                                                                                                                                                            | <ul style="list-style-type: none"> <li>○ Terrestrial: 33.1% (2000) -&gt; 46.1% (2018)</li> <li>○ Freshwater: 30.5% (2000) -&gt; 43.2% (2018)</li> <li>○ Mountain: 32.9% (2000) -&gt; 44.7% (2018)</li> <li>● Parties ratified <b>Nagoya Protocol</b> (regarding access to and fair and equitable use of genetic resources): 46 (2016) -&gt; 116 (2019)</li> <li>● Bilateral ODA in support of biodiversity: 15% increase form 2015 to 2017</li> </ul>                                                                           | <ul style="list-style-type: none"> <li>● 1.6 billion people depend on forests for livelihood (70 million indigenous people)</li> <li>● 20% of land area was degraded between 2000 and 2015 -&gt; disproportionately affects poor rural women</li> <li>● Land degradation affects 75% of world's poor</li> <li>● 52% of agricultural land affected by soil degradation</li> <li>● Drought and desertification leads to inability to cultivate 20 million tons of grain</li> <li>● &gt;80% of human diet is derived from plants</li> <li>● 80% of rural dwellers rely on traditional plant-based medicines</li> <li>● 10% increase risk of species extinction over past 25 years (red list)</li> </ul>     |
| <p><b>16. Peace, justice and strong institutions:</b> Promote peaceful and inclusive societies for sustainable development, provide access to justice for all and build effective, accountable and inclusive institutions at all levels</p> <p>(homicide, violence against children, human trafficking, sexual violence)</p> | <ul style="list-style-type: none"> <li>● 67 countries report progress alignment with <b>Sendai Framework</b> for Disaster Risk Reduction (2019)</li> <li>● 125 countries have laws and policies permitting individuals to access information held by public authorities</li> <li>● 39% of countries had institutions fully compliant with <b>Pairs Agreement</b> regarding human rights (2018)</li> </ul>                                                                                                                       | <ul style="list-style-type: none"> <li>● 73% of children &lt; 5y have birth registration (46% in SSA)</li> <li>● Corruption, bribery, theft, tax evasion -&gt; loss of US\$1.26 trillion in lower income countries annually</li> <li>● 28.5 million children do not attend primary school in conflict areas</li> <li>● 31% of all prisoners held in detention without sentencing</li> <li>● 50% of worlds children experience violence each year</li> <li>● 246 million children experience school-related violence each year</li> <li>● most trafficking victims are women and girls</li> <li>● Killings of human rights defenders is increasing</li> </ul>                                             |
| <p><b>17. Partnership for the goals:</b><br/>Strengthen the means of implementations and revitalize the Global Partnership for Sustainable Development</p> <ul style="list-style-type: none"> <li>● Governments</li> <li>● Private sector</li> <li>● Academia</li> <li>● Scientists</li> <li>● Civil society</li> </ul>      | <ul style="list-style-type: none"> <li>● SDGs adopted in 2015</li> <li>● Remittance flows (money sent back by workers outside the country): \$529 billion (2018) -&gt; \$550 billion (2019)</li> <li>● 51 of 114 countries -&gt; progress towards stringer multi-stakeholder partnerships (2018)</li> <li>● Countries with legislation compliant with <b>UN Fundamental Principles of Official Statistics</b>: 71 (2017) -&gt; 111 (2018)</li> <li>● 89% countries conducted at least 1 census between 2008 and 2017</li> </ul> | <ul style="list-style-type: none"> <li>● 67% of countries share <b>trans-boundary water</b> -&gt; 17 countries have operational agreements in place (2017-2018)</li> <li>● Net <b>ODA</b> declined 2.7 % from 2017 to 2018</li> <li>● Bilateral ODAs to LDCs fell by 3% from 2017 to 2018</li> <li>● Respect for country policies by bilateral development partners: 64% (2016) -&gt; 57% (2018)</li> <li>● <i>Finance:</i> <ul style="list-style-type: none"> <li>● Remittance flows are larger than foreign direct investment in LMICs (2019)</li> <li>● Taxation 23% of GDP in Group of 20 countries, 18% in emerging market economies</li> </ul> </li> <li>● <i>IT and communication:</i></li> </ul> |

| SDG | Progress | Gaps                                                                                                                                                                                                                                                                                                                                                                                                                                                                                                                                                                                                                                                                                                                                                                             |
|-----|----------|----------------------------------------------------------------------------------------------------------------------------------------------------------------------------------------------------------------------------------------------------------------------------------------------------------------------------------------------------------------------------------------------------------------------------------------------------------------------------------------------------------------------------------------------------------------------------------------------------------------------------------------------------------------------------------------------------------------------------------------------------------------------------------|
|     |          | <ul style="list-style-type: none"> <li>• Proportion of population using internet 4 fold higher in developed countries vs. LDCs</li> <li>• <i>Capacity-building:</i> <ul style="list-style-type: none"> <li>• Total ODA for capacity-building unchanged since 2010</li> </ul> </li> <li>• <i>Trade:</i> <ul style="list-style-type: none"> <li>• 79% imports from lower resource countries enter higher income countries duty free</li> <li>• share of global exports from LDCs: 1%</li> </ul> </li> <li>• Data monitoring, accountability:</li> <li>• 9 of 53 African countries met <b>standards for birth and death registration (2013-2017)</b> vs. 95% completeness of birth registries in 143 countries and 75% completeness of death registries in 149 countries</li> </ul> |

Data compiled from refs.<sup>2-4</sup>. DPT – diphtheria, pertussis, tetanus vaccine; ODA – official development assistance; HIV – human immunodeficiency virus; SSA – sub-Saharan Africa; FGM – female genital mutilation; GDP – gross domestic product; ATM – automated teller machine; \$ - US dollar; LDC – least developed countries; MVA – manufacturing value added; CHE – catastrophic health expenditure; IMF – international monetary fund; HIC – high income countries; LIC - low income countries; MIC – middle income countries; UN – United Nations

**Supplementary Table 3. Kidney failure snapshot – South Africa**

|                                                                                     | Public                                                                                                                                    | Private                           |
|-------------------------------------------------------------------------------------|-------------------------------------------------------------------------------------------------------------------------------------------|-----------------------------------|
| Proportion of population covered                                                    | 84%                                                                                                                                       | 16%                               |
| Access barriers                                                                     | Rationing, which is dependent on multi-criteria assessment of transplantability and is influenced by socioeconomic factors <sup>148</sup> | Ability to pay; private insurance |
| Number of incident KRT patients <sup>a</sup> (% of total KRT population)            | 230 (16%)                                                                                                                                 | 1210 (84%)                        |
| KRT prevalence (pmp)                                                                | 66                                                                                                                                        | 855                               |
| KRT prevalence by ethnicity <sup>b</sup> (pmp)                                      |                                                                                                                                           |                                   |
| <i>Black (79.2%)</i>                                                                |                                                                                                                                           | 124                               |
| <i>Coloured (8.9%)</i>                                                              |                                                                                                                                           | 333                               |
| <i>Indian or Asian (2.5%)</i>                                                       |                                                                                                                                           | 853                               |
| <i>White (8.9%)</i>                                                                 |                                                                                                                                           | 405                               |
| Number of dialysis centres (rate, pmp)                                              | 29 (0.6)                                                                                                                                  | 249 (28)                          |
| Number of kidney transplant centres (rate, pmp)                                     | 6 (0.12)                                                                                                                                  | 9 (1)                             |
| Number of patients receiving haemodialysis (% of total sector KRT population)       | 1282 (40.9%)                                                                                                                              | 6400 (84.1%)                      |
| Number of patients receiving peritoneal dialysis (% of total sector KRT population) | 814 (26%)                                                                                                                                 | 385 (5.1%)                        |
| Number of patients who received a transplant (% of total KRT sector population)     | 1038 (33.1%)                                                                                                                              | 825 (10.4%)                       |
| Mean patient age (years)                                                            | 44.3                                                                                                                                      | 55.9                              |

KRT, kidney replacement therapy (that is, dialysis and transplantation); pmp, per million population. <sup>a</sup>Data derived from Renal Registry Annual Report 2017 (REF. <sup>5,6</sup>).

<sup>b</sup>Percentages refer to % of total population according to the 2011 census

## References

- 1 United Nations. The Millennium Development Goals Report (UN, 2015).  
[https://www.un.org/millenniumgoals/2015\\_MDG\\_Report/pdf/MDG%202015%20rev%20\(July%201\).pdf](https://www.un.org/millenniumgoals/2015_MDG_Report/pdf/MDG%202015%20rev%20(July%201).pdf)
- 2 United Nations. *The Sustainable Development Agenda* <https://www.un.org/sustainabledevelopment/development-agenda/> (2020).
- 3 United Nations. Report of the Secretary-General on SDG Progress 2019 (UN, 2019).  
[https://sustainabledevelopment.un.org/content/documents/24978Report\\_of\\_the\\_SG\\_on\\_SDG\\_Progress\\_2019.pdf](https://sustainabledevelopment.un.org/content/documents/24978Report_of_the_SG_on_SDG_Progress_2019.pdf)
- 4 World Health Organization. World Health Statistics 2020: Monitoring health for the SDGs (WHO, 2020).  
[https://www.who.int/gho/publications/world\\_health\\_statistics/2020/EN\\_WHS\\_2020\\_TOC.pdf?ua=1](https://www.who.int/gho/publications/world_health_statistics/2020/EN_WHS_2020_TOC.pdf?ua=1)
- 5 Davids, M. R. *et al.* South African Renal Registry. Annual Report 2017. (South Africa, 2019).  
<https://www.journals.ac.za/index.php/ajn/article/view/3810>
- 6 Mshumpela, C. N., Etheredge, H. R., Fabian, J., Loveland, J. & Botha, J. Access to Renal Replacement Therapy in South Africa - A Cry for Action. *Transplantation* **104**, 1109-1111 (2020).
